# Supplementary material
Source: publisher site journal article supplement (https://www.dovepress.com/article/508278)
Supplement: Supplementary file 1 [file get_supplementary_file.php]

**Figure captions**

**Fig.S1 Mendelian Visualization Analysis of Metformin and Postmenopausal Osteoporosis with Pathological Fracture**

**
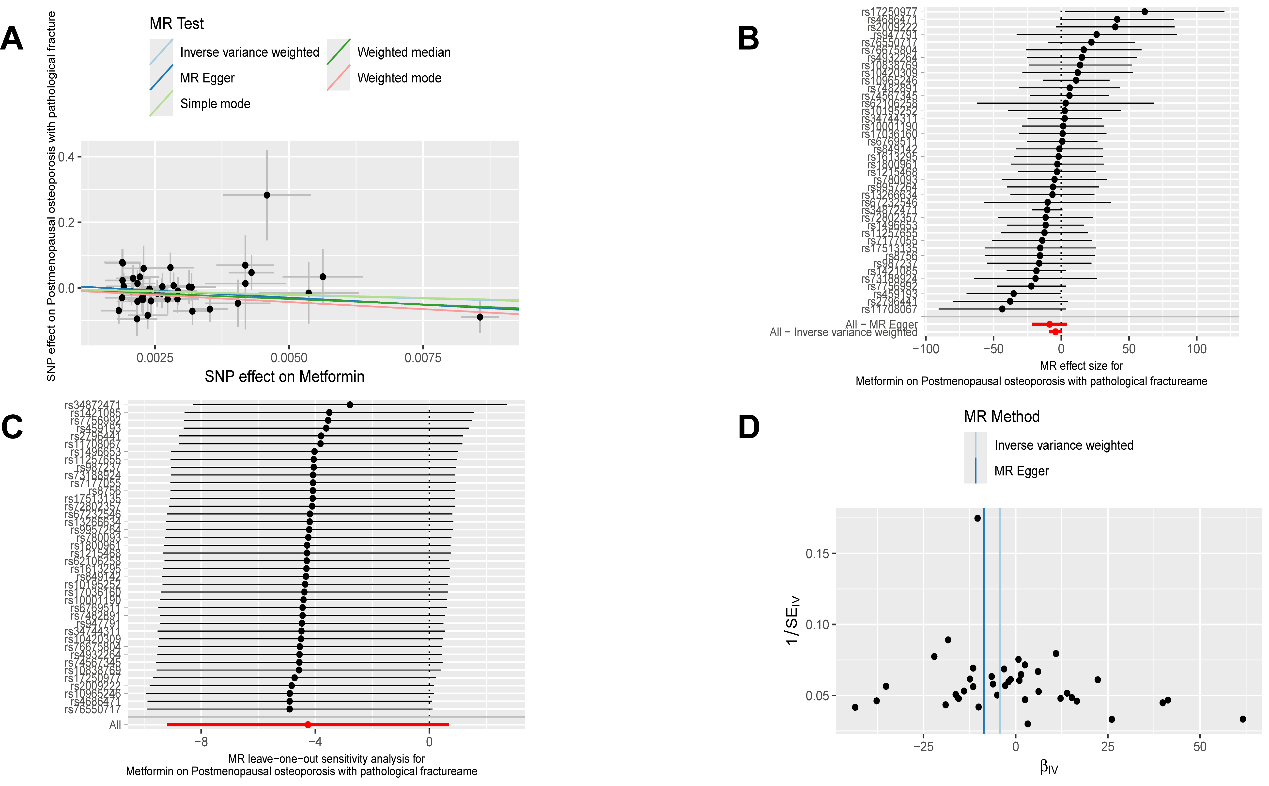
**

**Fig. S2 Mendelian Visualization Analysis of Metformin and Osteoporosis with Pathological Fracture**

**
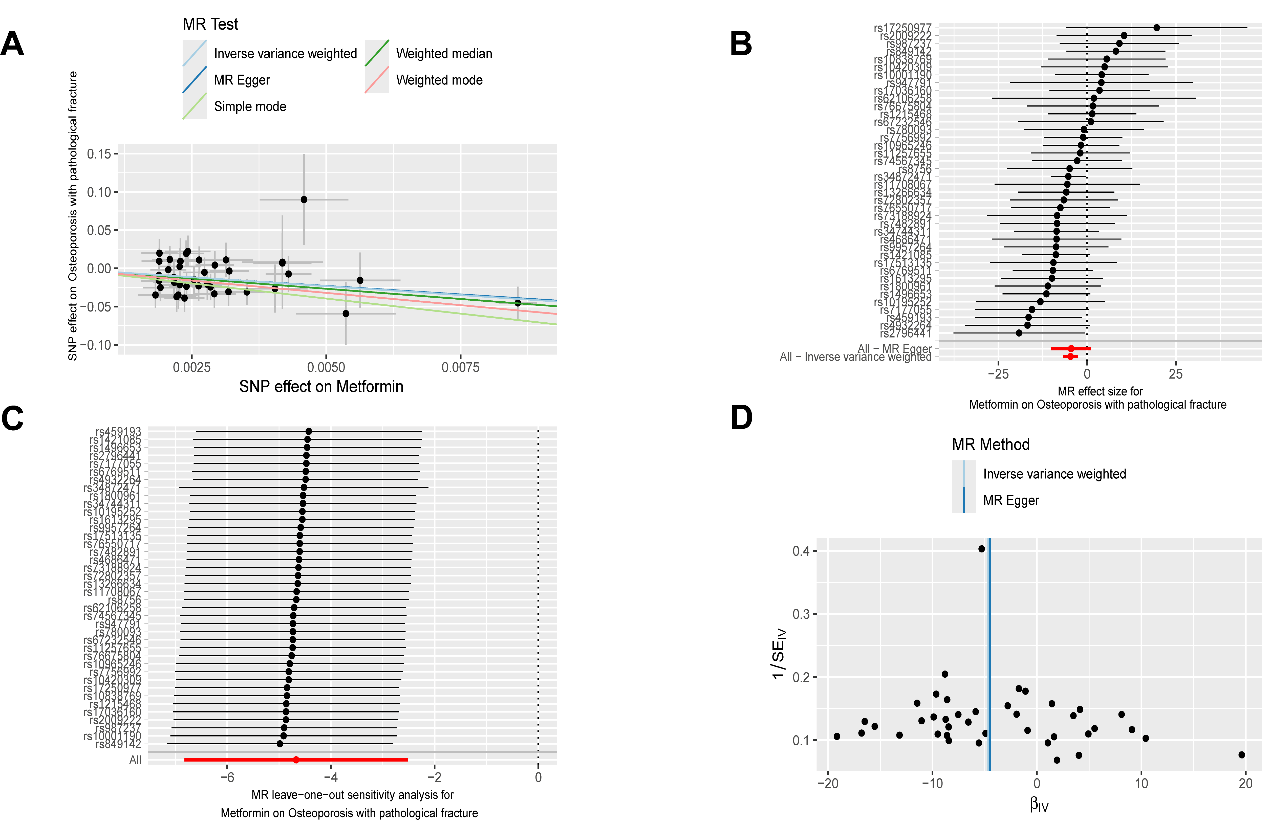
**

**Fig. S3 Mendelian Visualization Analysis of Metformin and Pharmacological Osteoporosis with Pathological Fracture**

**
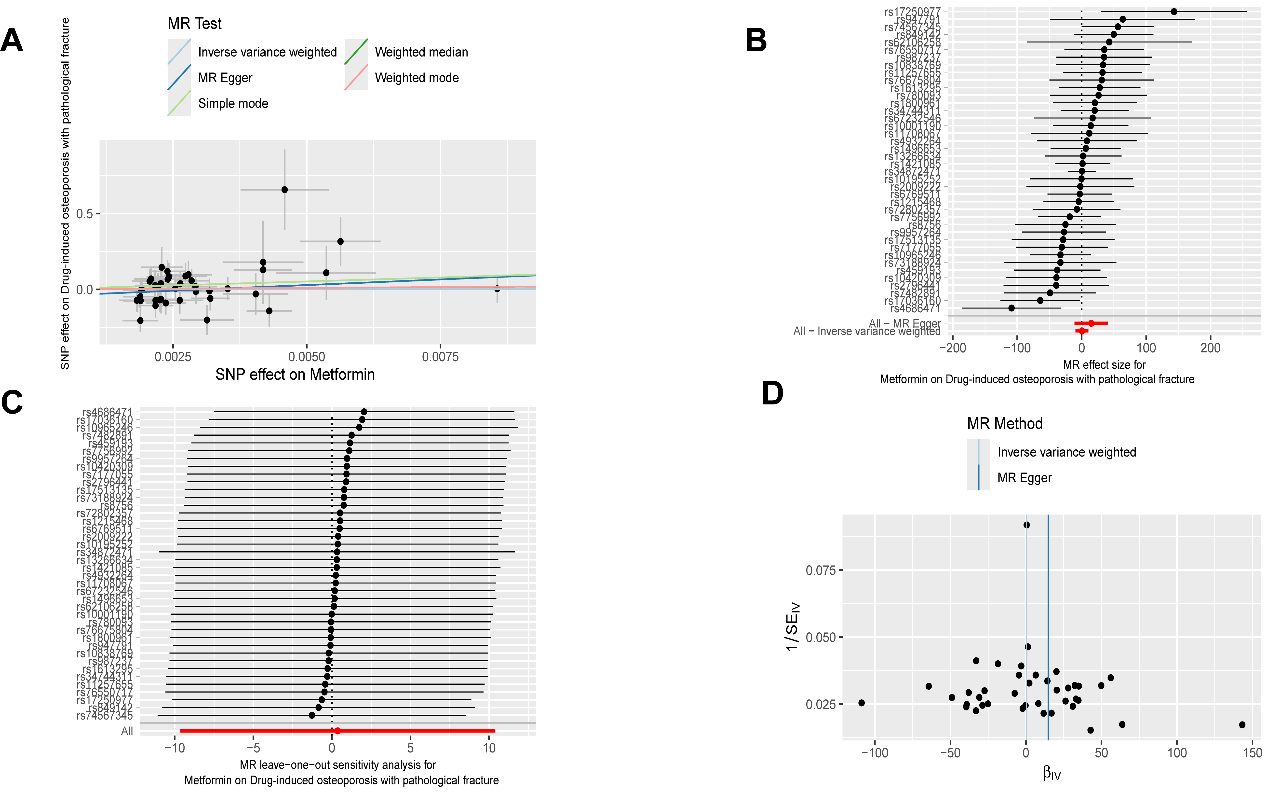
**

**Fig. S4 Mendelian Visualization Analysis of GLP-1 Receptor Agonists and Postmenopausal Osteoporosis with Pathological Fracture**

**
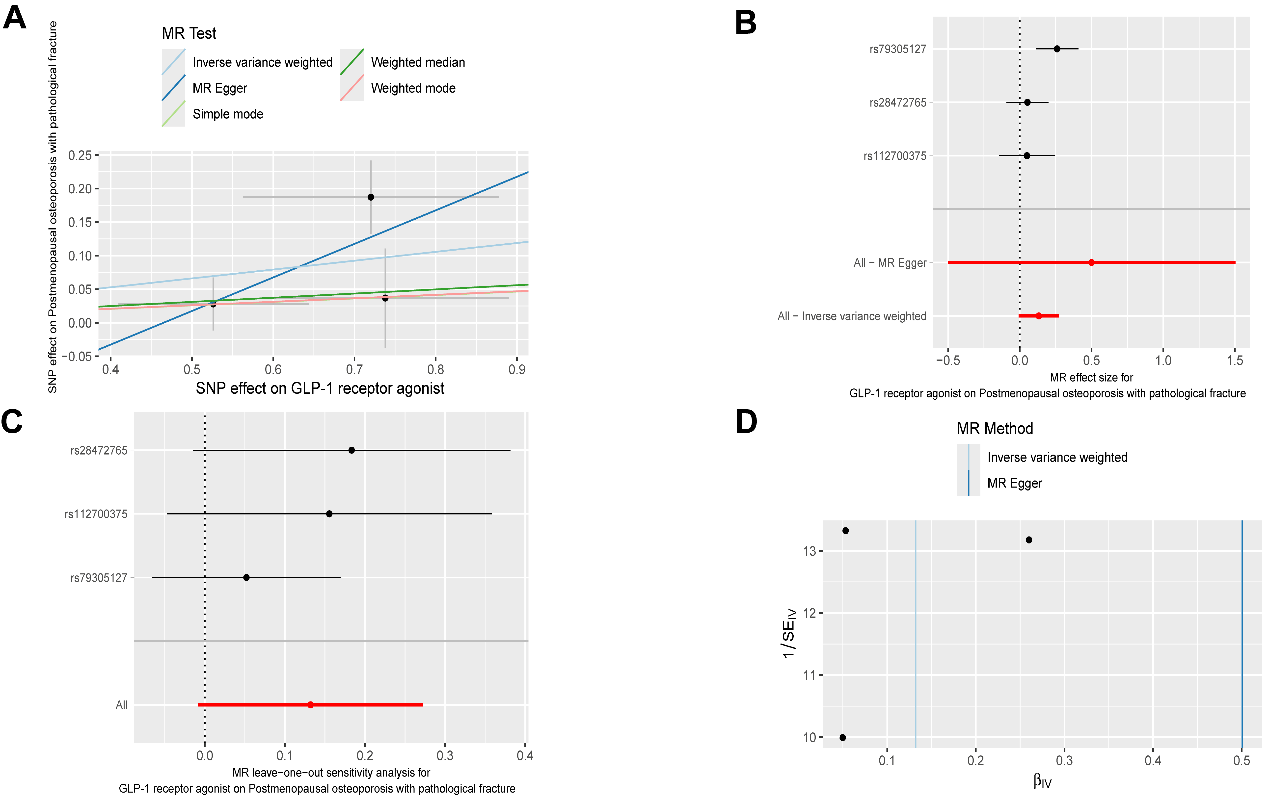
**

**Fig. S5 Mendelian Visualization Analysis of GLP-1 Receptor Agonists and Pharmacological Osteoporosis with Pathological Fracture**

**
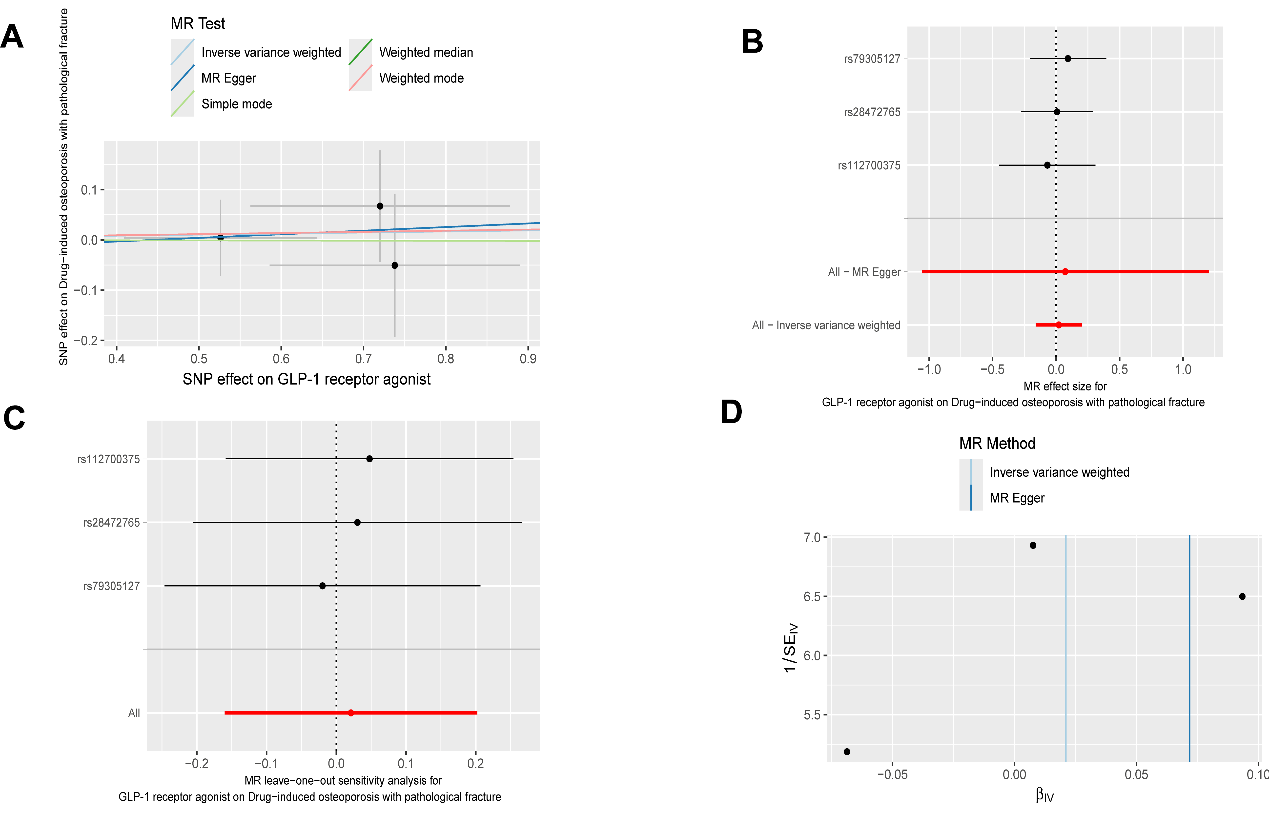
**

**Fig. S6 Mendelian Visualization Analysis of SGLT2 Inhibitors and Postmenopausal Osteoporosis with Pathological Fracture**

**
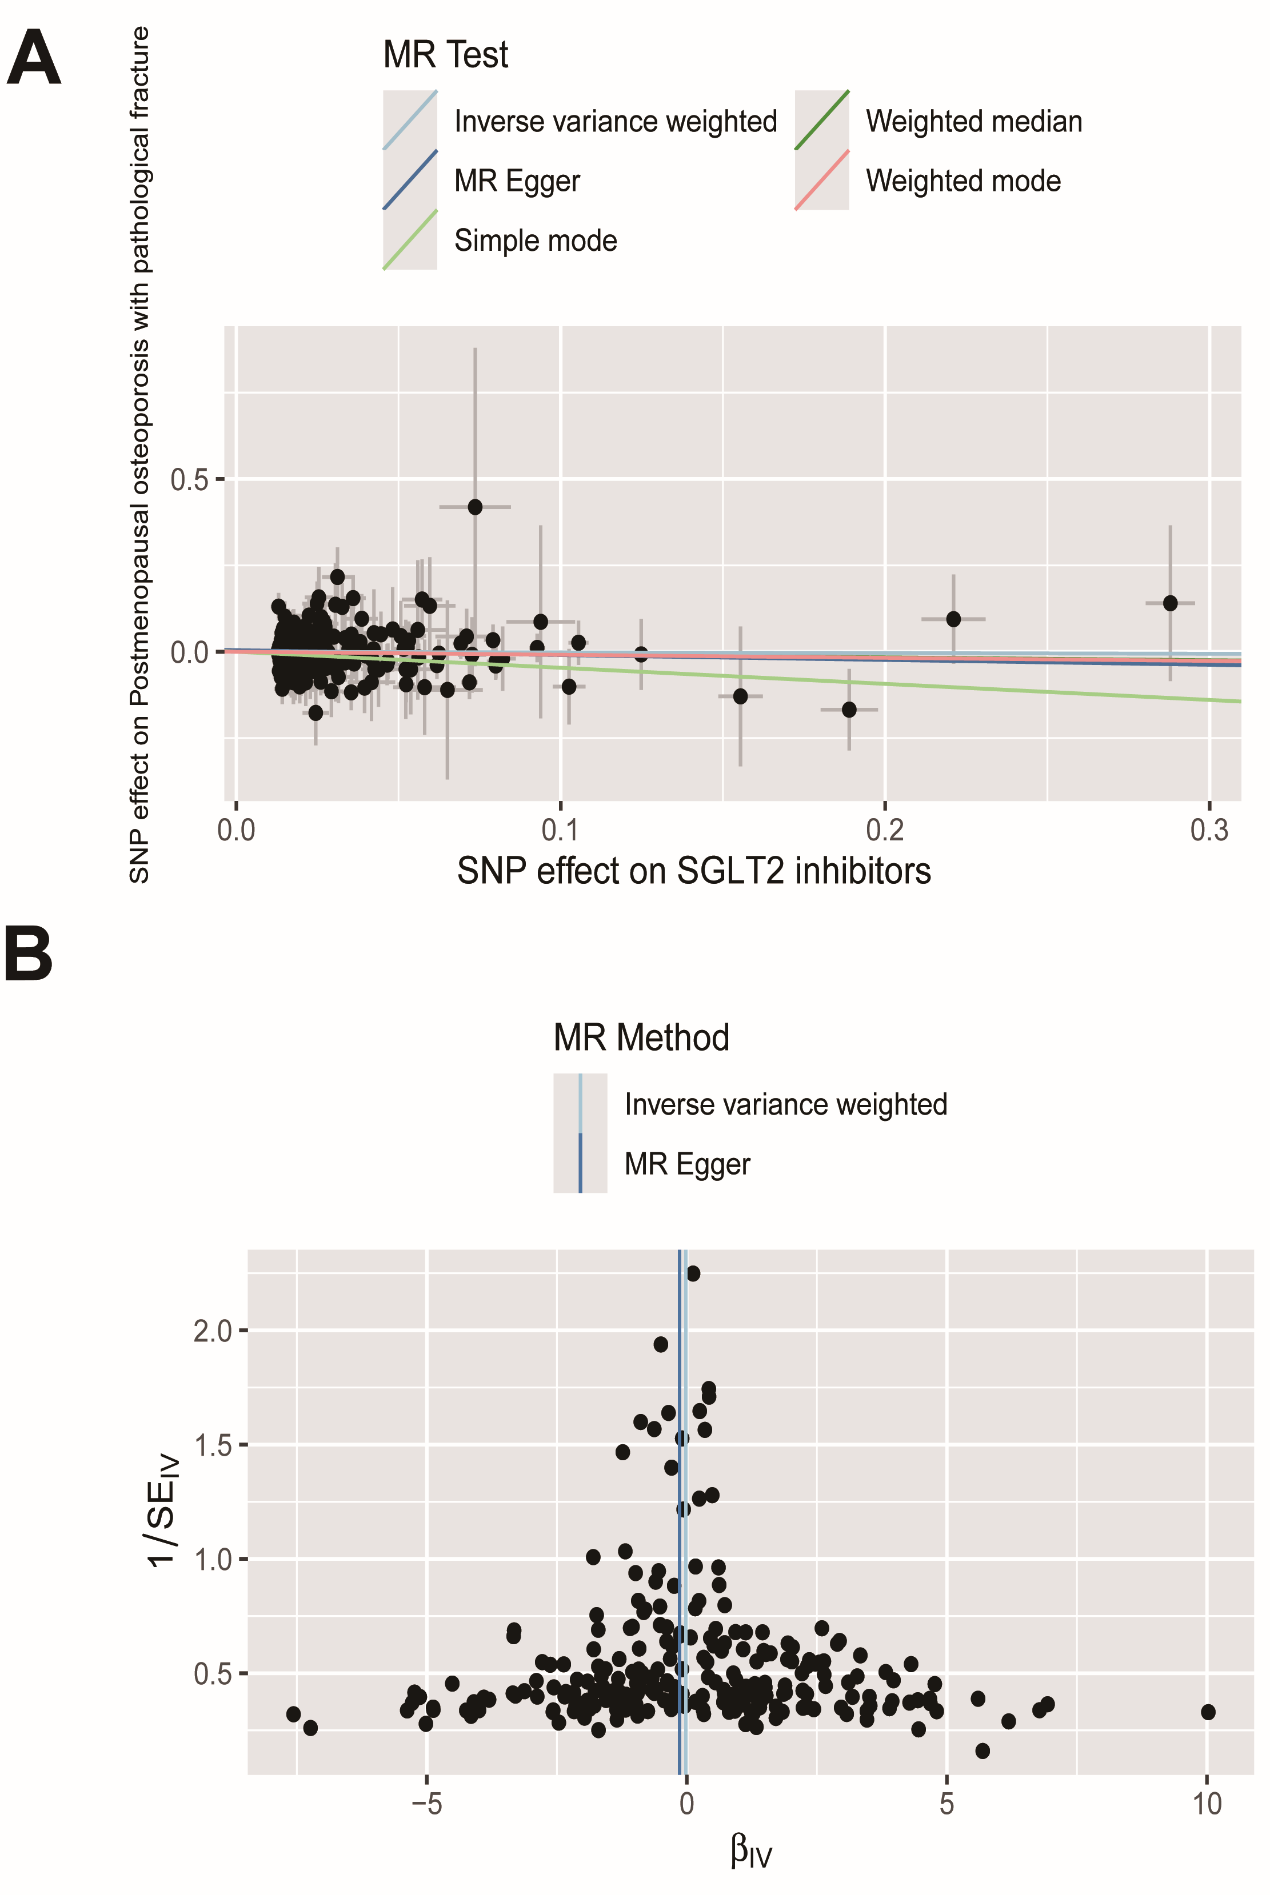
**

**Fig. S7 Mendelian Visualization Analysis of SGLT2 Inhibitors and Osteoporosis with Pathological Fracture**

**
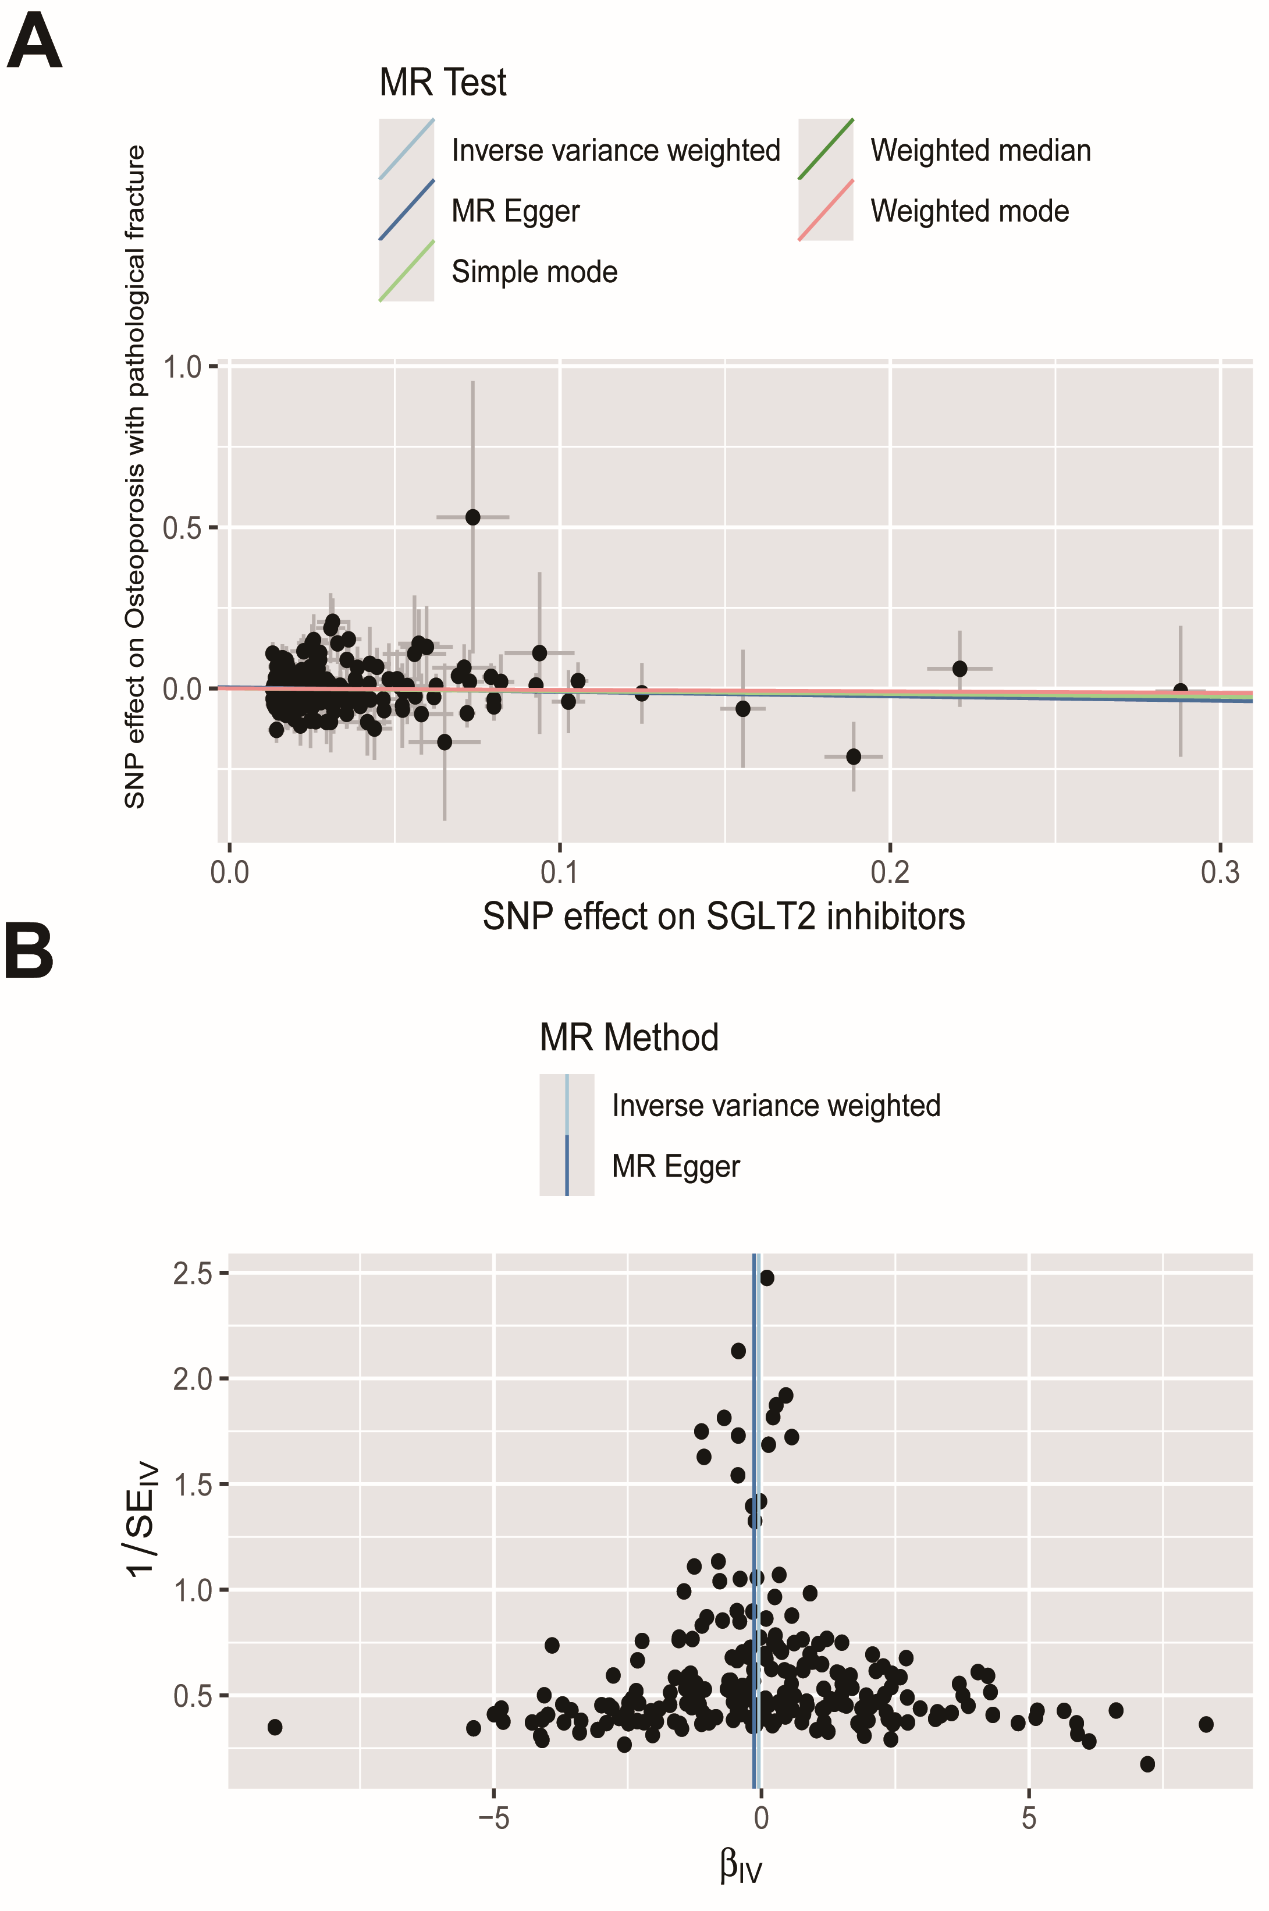
**

**Fig. S8 Mendelian Visualization Analysis of SGLT2 Inhibitors and Pharmacological Osteoporosis with Pathological Fracture**

**
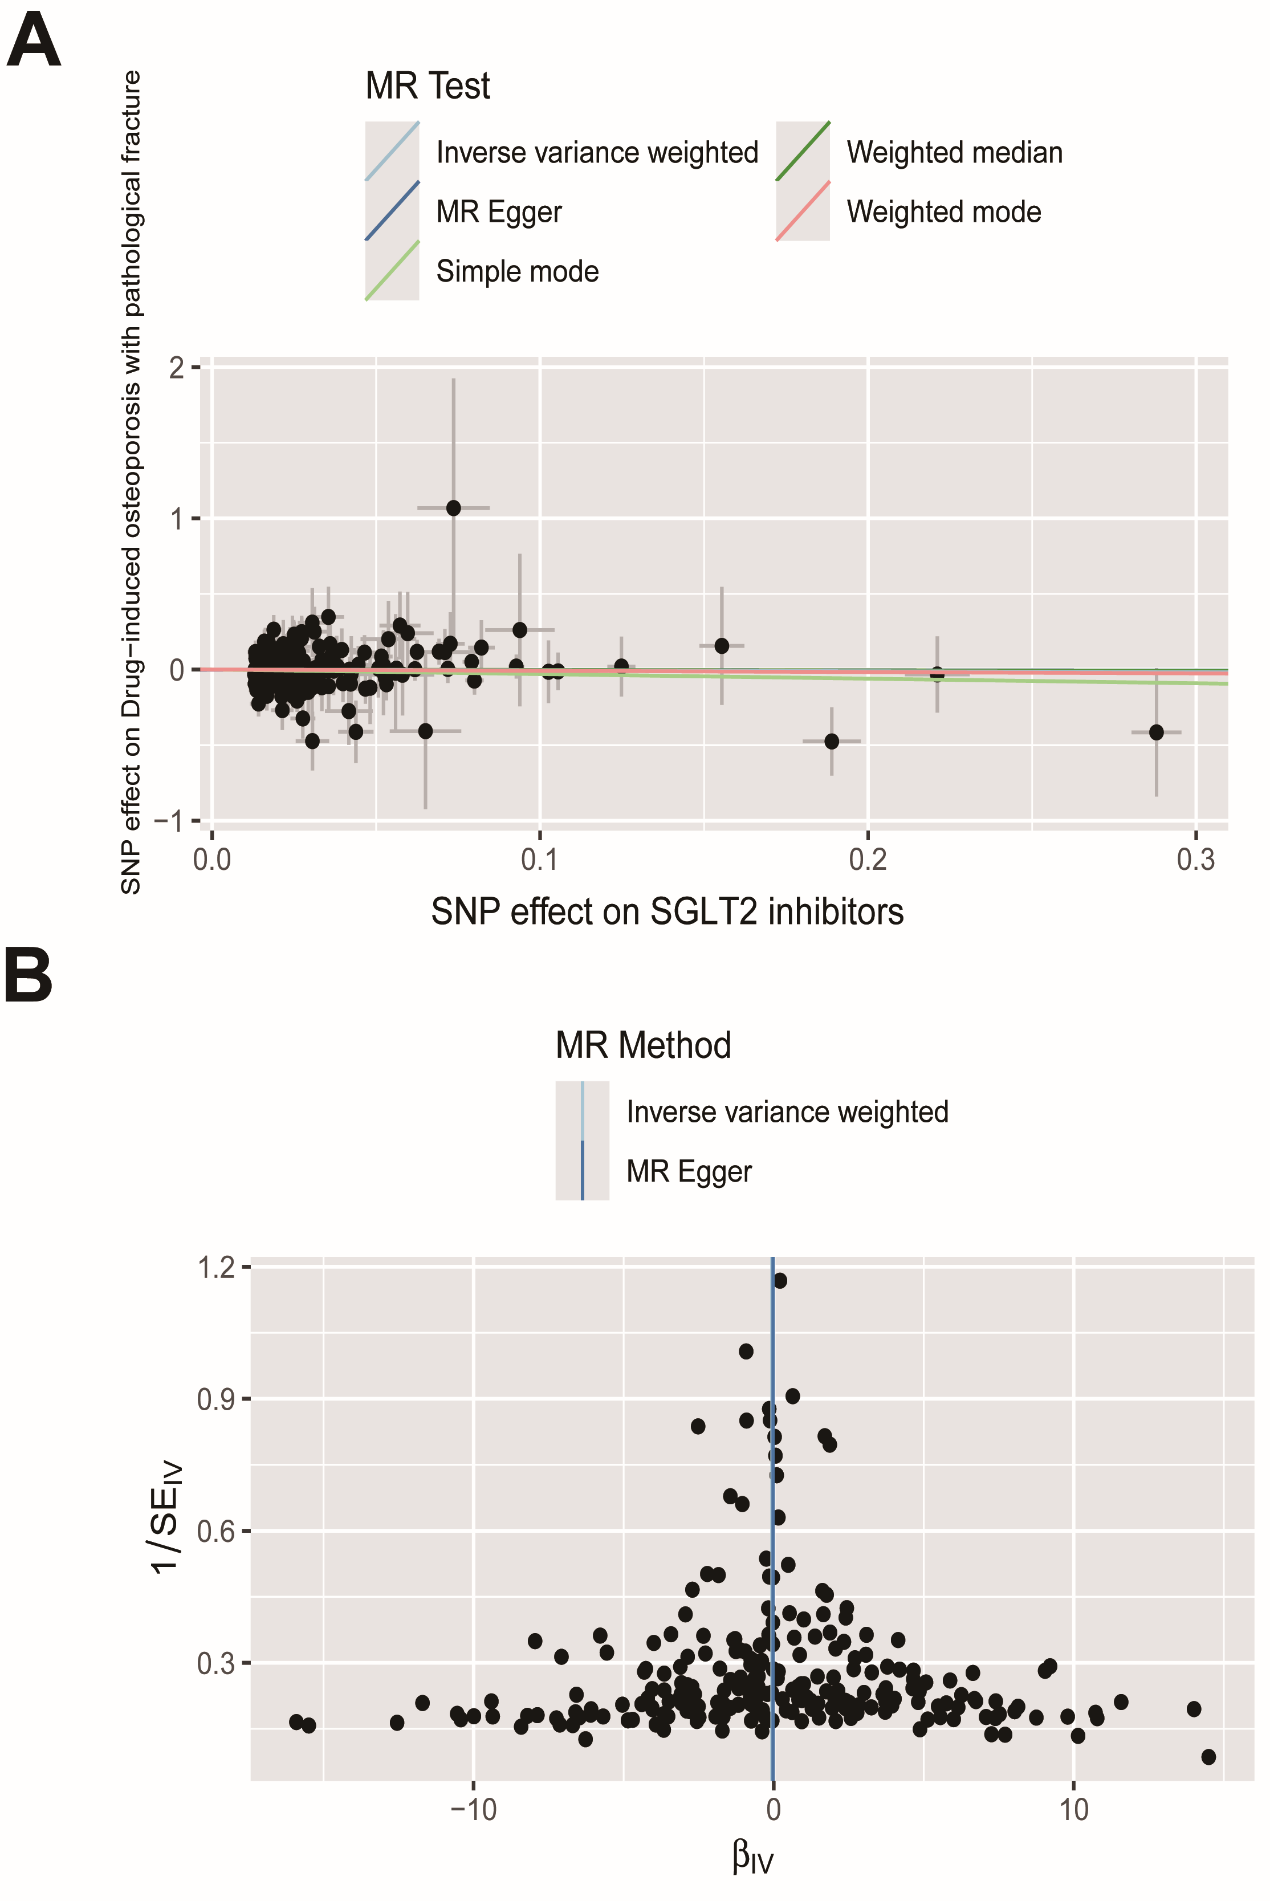
**

**Fig. S9 Mendelian Visualization Analysis of Insulin and Postmenopausal Osteoporosis with Pathological Fracture**

**
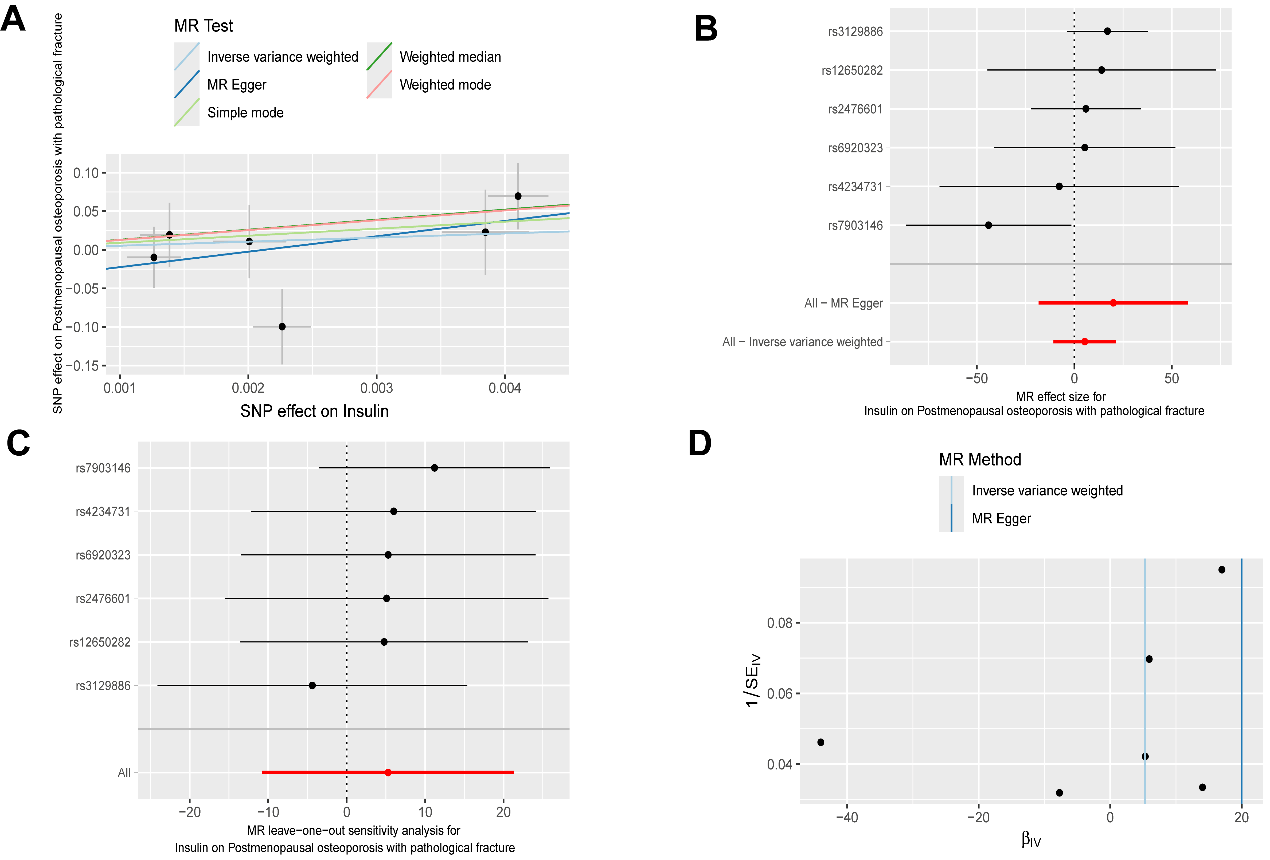
**

**Fig. S10 Mendelian Visualization Analysis of Insulin and Osteoporosis with Pathological Fracture**

**
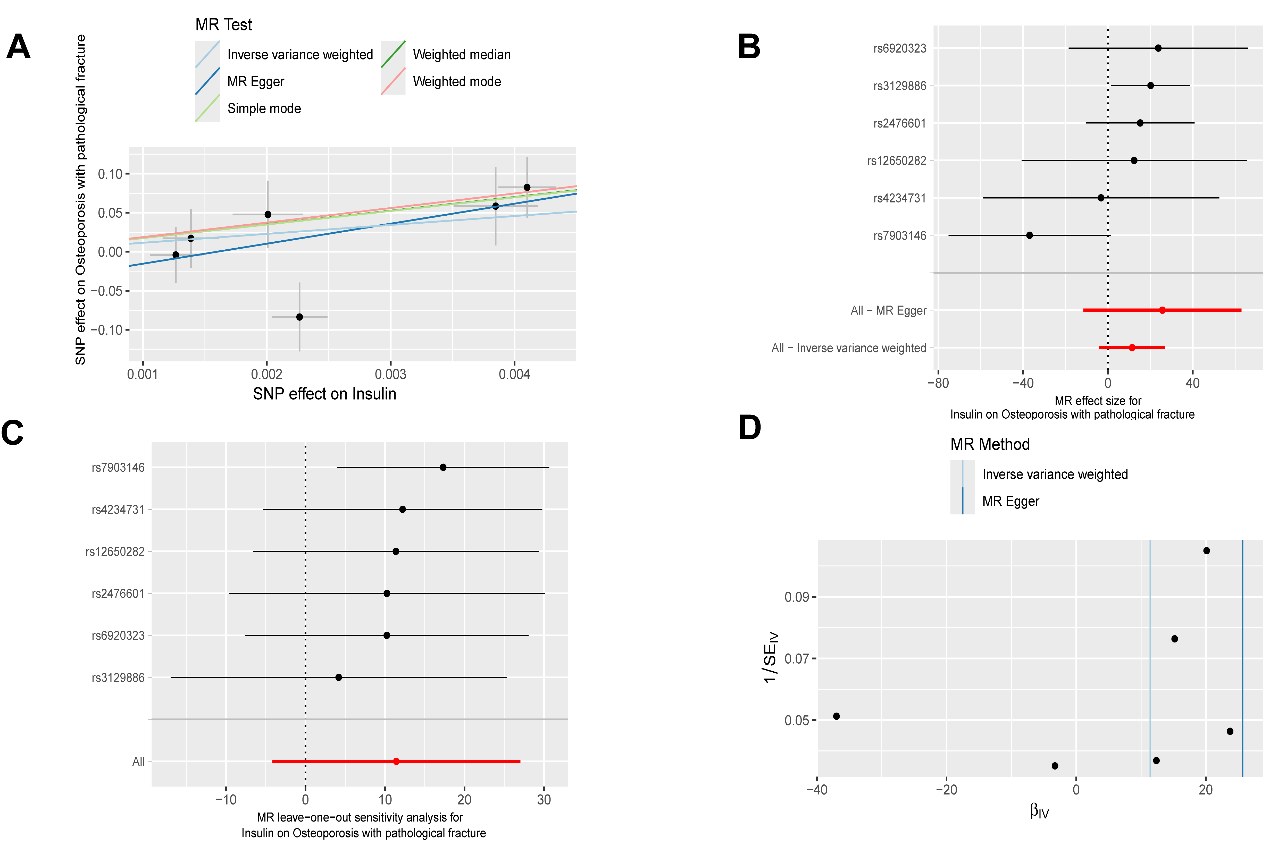
**

**Fig. S11 Mendelian Visualization Analysis of Insulin and Pharmacological Osteoporosis with Pathological Fracture**

**
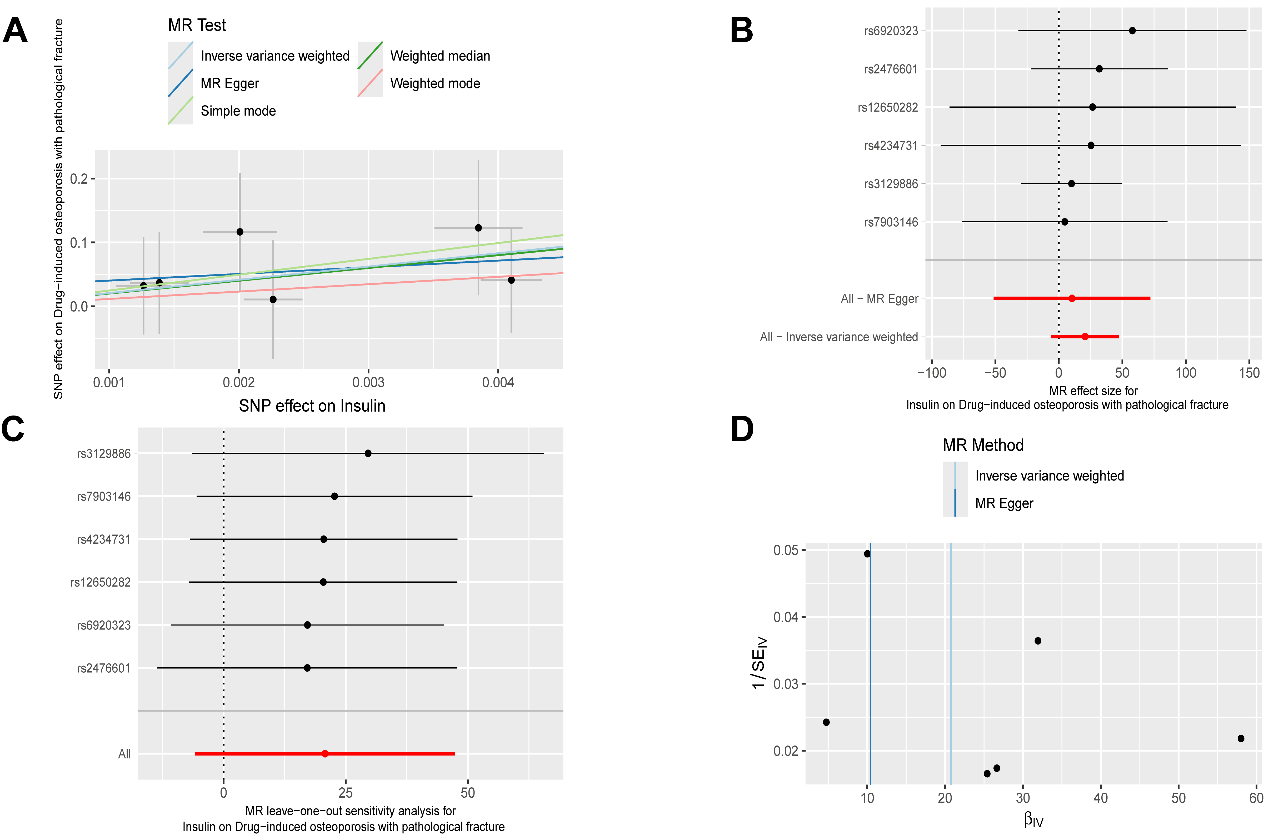
**

**Fig. S12 Mendelian Visualization Analysis of Gliclazide and Postmenopausal Osteoporosis with Pathological Fracture**

**
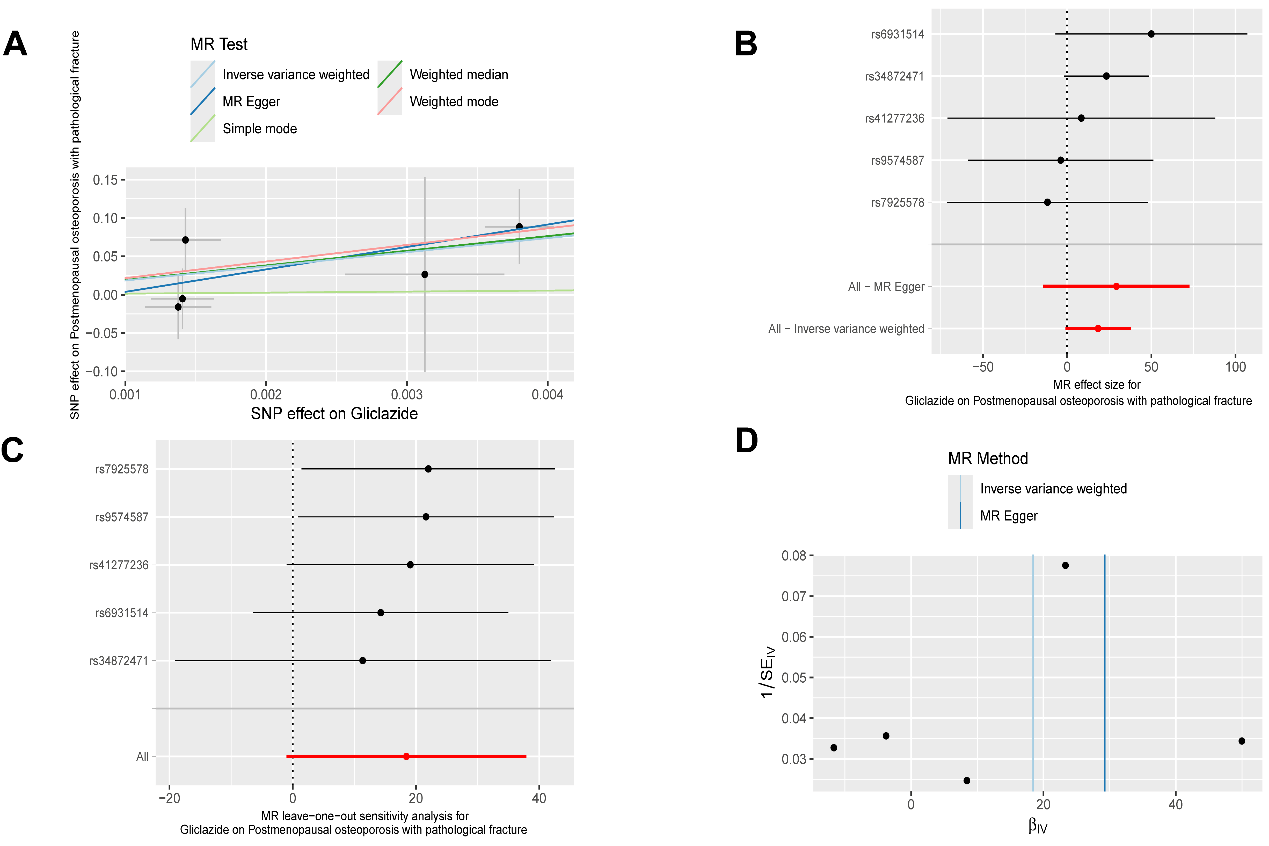
**

**Fig. S13 Mendelian Visualization Analysis of Gliclazide and Pharmacological Osteoporosis with Pathological Fracture**

**
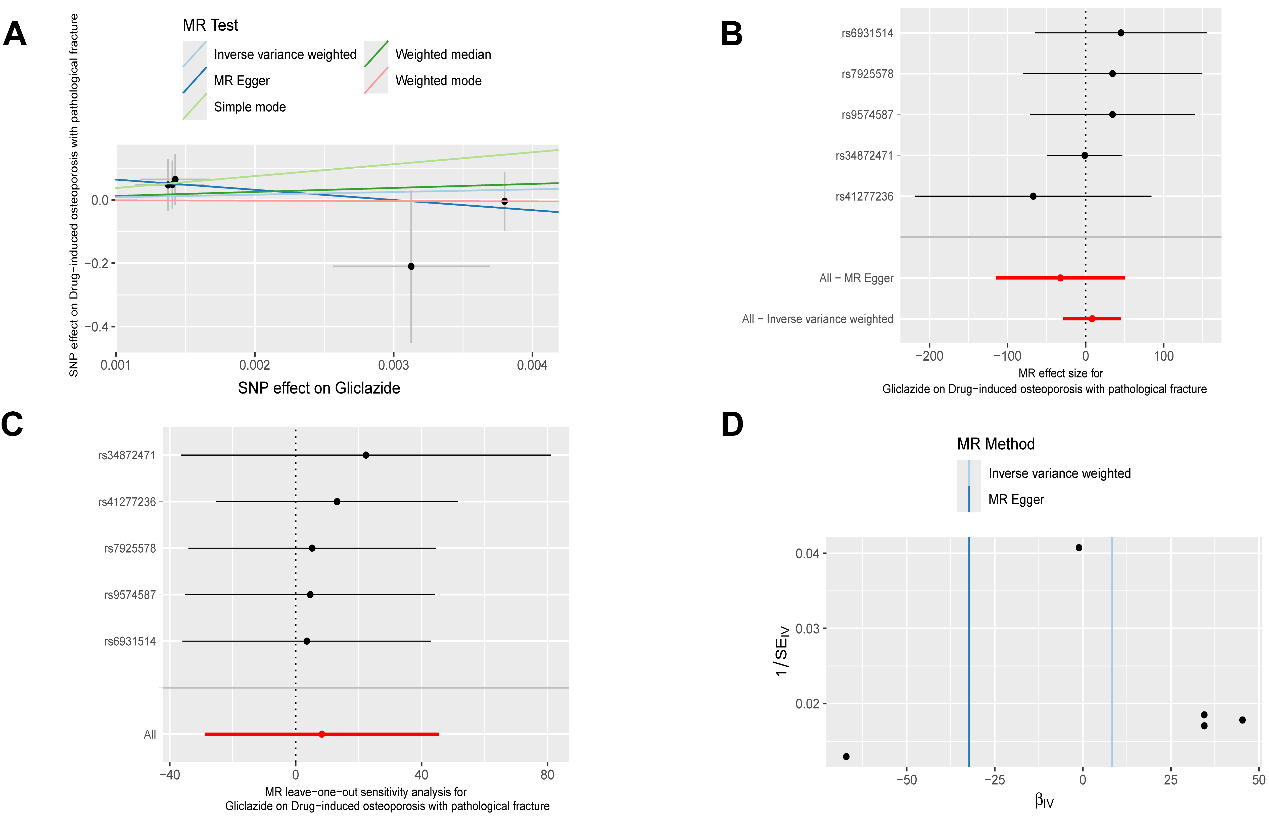
**

**Table captions**

**Table S1 Mendelian randomization results of metformin and other subtypes, including postmenopausal osteoporosis with pathological fractures.**

| exposure factors | outcome factors | b | se | pval | lo_ci | up_ci | or | or_lci95 | or_uci95 |
| --- | --- | --- | --- | --- | --- | --- | --- | --- | --- |
| Metformin Treatment | Postmenopausal osteoporosis with pathological fracture | -8.616118844 | 6.603163063 | 0.199791866 | -21.55831845 | 4.326080759 | 0.000181162 | 4.33852E-10 | 75.64722512 |
| Metformin Treatment | Postmenopausal osteoporosis with pathological fracture | -6.672395917 | 3.879021945 | 0.085410036 | -14.27527893 | 0.930487095 | 0.001265363 | 6.3143E-07 | 2.535744025 |
| Metformin Treatment | Postmenopausal osteoporosis with pathological fracture | -4.255591316 | 2.52327567 | 0.091692908 | -9.201211629 | 0.690028996 | 0.014184701 | 0.000100917 | 1.993773345 |
| Metformin Treatment | Postmenopausal osteoporosis with pathological fracture | -4.003391231 | 7.23080983 | 0.582973908 | -18.1757785 | 10.16899604 | 0.018253632 | 1.2775E-08 | 26081.87833 |
| Metformin Treatment | Postmenopausal osteoporosis with pathological fracture | -8.592453076 | 4.567105295 | 0.067400384 | -17.54397945 | 0.359073303 | 0.0001855 | 2.40296E-08 | 1.432001768 |
| Metformin Treatment | Osteoporosis with pathological fracture | -4.219157733 | 6.240509522 | 0.503076682 | -16.4505564 | 8.012240931 | 0.01471103 | 7.17157E-08 | 3017.671935 |
| Metformin Treatment | Osteoporosis with pathological fracture | -7.111456548 | 3.541091369 | 0.044614938 | -14.05199563 | -0.170917465 | 0.000815706 | 7.89398E-07 | 0.842891138 |
| Metformin Treatment | Osteoporosis with pathological fracture | -3.765407649 | 2.362961749 | 0.111045403 | -8.396812677 | 0.86599738 | 0.02315817 | 0.000225585 | 2.377376051 |
| Metformin Treatment | Osteoporosis with pathological fracture | -4.135260717 | 6.577370296 | 0.533203933 | -17.0269065 | 8.756385064 | 0.015998494 | 4.03003E-08 | 6351.111168 |
| Metformin Treatment | Osteoporosis with pathological fracture | -6.761809389 | 4.337711705 | 0.127112564 | -15.26372433 | 1.740105552 | 0.001157134 | 2.3499E-07 | 5.69794482 |
| Metformin Treatment | Drug-induced osteoporosis | 7.782813379 | 16.45391174 | 0.638914099 | -24.46685363 | 40.03248038 | 2399.014673 | 2.3669E-11 | 2.43156E+17 |
| Metformin Treatment | Drug-induced osteoporosis | 12.41071255 | 8.609315865 | 0.149430895 | -4.463546545 | 29.28497164 | 245416.6235 | 0.011521429 | 5.22759E+12 |
| Metformin Treatment | Drug-induced osteoporosis | 2.402993652 | 6.234431205 | 0.699912107 | -9.81649151 | 14.62247881 | 11.05622538 | 5.45446E-05 | 2241103.224 |
| Metformin Treatment | Drug-induced osteoporosis | 3.127257866 | 17.0470331 | 0.855396327 | -30.284927 | 36.53944273 | 22.81134194 | 7.03758E-14 | 7.39398E+15 |
| Metformin Treatment | Drug-induced osteoporosis | 13.86440573 | 10.61907252 | 0.199333658 | -6.948976409 | 34.67778787 | 1050110.266 | 0.000959617 | 1.14914E+15 |
| Metformin Treatment | Drug-induced osteoporosis with pathological fracture | 14.853788 | 13.22610389 | 0.268455031 | -11.06937563 | 40.77695163 | 2824347.721 | 1.55823E-05 | 5.11924E+17 |
| Metformin Treatment | Drug-induced osteoporosis with pathological fracture | 0.675615631 | 7.483287625 | 0.928062119 | -13.99162811 | 15.34285938 | 1.965242468 | 8.38519E-07 | 4605949.409 |
| Metformin Treatment | Drug-induced osteoporosis with pathological fracture | 0.364852261 | 5.10765464 | 0.943053588 | -9.646150834 | 10.37585536 | 1.440301204 | 6.4674E-05 | 32075.74309 |
| Metformin Treatment | Drug-induced osteoporosis with pathological fracture | 10.51679264 | 14.00075066 | 0.457065734 | -16.92467866 | 37.95826393 | 36930.48481 | 4.46381E-08 | 3.05538E+16 |
| Metformin Treatment | Drug-induced osteoporosis with pathological fracture | 2.049211631 | 8.912598135 | 0.819353283 | -15.41948071 | 19.51790398 | 7.761779544 | 2.01097E-07 | 299583572.2 |

**Table S2 Mendelian randomization results of GLP-1 receptor agonists and other subtypes, including osteoporosis.**

| exposure factors | outcome factors | method | b | se | pval | lo_ci | up_ci | or | or_lci95 | or_uci95 |
| --- | --- | --- | --- | --- | --- | --- | --- | --- | --- | --- |
| GLP-1 receptor agonist | Osteoporosis | MR Egger | 0.076818404 | 0.198543123 | 0.764978071 | -0.312326116 | 0.465962924 | 1.079845963 | 0.731742856 | 1.593547917 |
| GLP-1 receptor agonist | Osteoporosis | Weighted median | 0.032422554 | 0.028216572 | 0.250530954 | -0.022881927 | 0.087727035 | 1.032953892 | 0.977377879 | 1.091690088 |
| GLP-1 receptor agonist | Osteoporosis | Inverse variance weighted | 0.03724019 | 0.022954555 | 0.104729658 | -0.007750737 | 0.082231118 | 1.037942294 | 0.992279222 | 1.085706707 |
| GLP-1 receptor agonist | Osteoporosis | Simple mode | 0.018839188 | 0.033709479 | 0.632476773 | -0.047231391 | 0.084909768 | 1.019017765 | 0.953866656 | 1.088618834 |
| GLP-1 receptor agonist | Osteoporosis | Weighted mode | 0.027739227 | 0.033684116 | 0.49678896 | -0.038281639 | 0.093760094 | 1.028127542 | 0.962441841 | 1.098296226 |
| GLP-1 receptor agonist | Postmenopausal osteoporosis with pathological fracture | MR Egger | 0.500554219 | 0.511919389 | 0.507145854 | -0.502807783 | 1.50391622 | 1.649635276 | 0.604830042 | 4.499274764 |
| GLP-1 receptor agonist | Postmenopausal osteoporosis with pathological fracture | Weighted median | 0.062128332 | 0.066994827 | 0.353739582 | -0.069181529 | 0.193438193 | 1.064098894 | 0.933157269 | 1.213414387 |
| GLP-1 receptor agonist | Postmenopausal osteoporosis with pathological fracture | Inverse variance weighted | 0.132085126 | 0.071596967 | 0.065060458 | -0.00824493 | 0.272415182 | 1.141205461 | 0.991788966 | 1.313132076 |
| GLP-1 receptor agonist | Postmenopausal osteoporosis with pathological fracture | Simple mode | 0.051592567 | 0.086823771 | 0.612627882 | -0.118582023 | 0.221767158 | 1.05294665 | 0.888178961 | 1.248280692 |
| GLP-1 receptor agonist | Postmenopausal osteoporosis with pathological fracture | Weighted mode | 0.052044979 | 0.075503899 | 0.561863098 | -0.095942662 | 0.200032621 | 1.053423124 | 0.908516107 | 1.221442602 |
| GLP-1 receptor agonist | Drug-induced osteoporosis | MR Egger | -0.34895035 | 1.303661484 | 0.833499506 | -2.904126858 | 2.206226158 | 0.705428154 | 0.054796615 | 9.081379947 |
| GLP-1 receptor agonist | Drug-induced osteoporosis | Weighted median | 0.005454133 | 0.138126372 | 0.968502485 | -0.265273556 | 0.276181821 | 1.005469033 | 0.766996105 | 1.318087499 |
| GLP-1 receptor agonist | Drug-induced osteoporosis | Inverse variance weighted | -0.021991791 | 0.152462982 | 0.88530821 | -0.320819236 | 0.276835655 | 0.978248266 | 0.725554393 | 1.31894959 |
| GLP-1 receptor agonist | Drug-induced osteoporosis | Simple mode | 0.115881286 | 0.189594194 | 0.603277447 | -0.255723335 | 0.487485906 | 1.122862564 | 0.774356176 | 1.628217579 |
| GLP-1 receptor agonist | Drug-induced osteoporosis | Weighted mode | 0.057388326 | 0.185760262 | 0.786581102 | -0.306701788 | 0.42147844 | 1.059066994 | 0.735870013 | 1.524213349 |
| GLP-1 receptor agonist | Drug-induced osteoporosis with pathological fracture | MR Egger | 0.071722896 | 0.576315588 | 0.921177471 | -1.057855657 | 1.201301448 | 1.074357594 | 0.347199528 | 3.324440697 |
| GLP-1 receptor agonist | Drug-induced osteoporosis with pathological fracture | Weighted median | 0.021747329 | 0.112180982 | 0.846286036 | -0.198127395 | 0.241622053 | 1.021985526 | 0.820265349 | 1.273312857 |
| GLP-1 receptor agonist | Drug-induced osteoporosis with pathological fracture | Inverse variance weighted | 0.021029276 | 0.092382969 | 0.819932714 | -0.160041344 | 0.202099895 | 1.021251949 | 0.852108559 | 1.223970271 |
| GLP-1 receptor agonist | Drug-induced osteoporosis with pathological fracture | Simple mode | -0.002197946 | 0.129592587 | 0.988008025 | -0.256199417 | 0.251803524 | 0.997804467 | 0.773987607 | 1.286343277 |
| GLP-1 receptor agonist | Drug-induced osteoporosis with pathological fracture | Weighted mode | 0.022915087 | 0.121495433 | 0.867804038 | -0.215215963 | 0.261046136 | 1.023179654 | 0.806367276 | 1.298287562 |

**Table S3 Mendelian randomization results of SGLT2 inhibitors and other subtypes, including postmenopausal osteoporosis with pathological bone.**

| exposure factors | outcome factors | method | b | se | pval | lo_ci | up_ci | or | or_lci95 | or_uci95 |
| --- | --- | --- | --- | --- | --- | --- | --- | --- | --- | --- |
| SGLT2 Inhibitors | Postmenopausal osteoporosis with pathological fracture | MR Egger | -0.140435185 | 0.192064031 | 0.465388817 | -0.516880685 | 0.236010315 | 0.868979986 | 0.59637794 | 1.26618737 |
| SGLT2 Inhibitors | Postmenopausal osteoporosis with pathological fracture | Weighted median | -0.082403281 | 0.167560041 | 0.622872328 | -0.410820962 | 0.246014399 | 0.920900502 | 0.663105642 | 1.278917989 |
| SGLT2 Inhibitors | Postmenopausal osteoporosis with pathological fracture | Inverse variance weighted | -0.019515322 | 0.106003103 | 0.853933895 | -0.227281404 | 0.188250761 | 0.98067387 | 0.796696557 | 1.20713618 |
| SGLT2 Inhibitors | Postmenopausal osteoporosis with pathological fracture | Simple mode | -0.465409212 | 0.327632322 | 0.15676975 | -1.107568562 | 0.176750139 | 0.627878118 | 0.330361238 | 1.193332888 |
| SGLT2 Inhibitors | Postmenopausal osteoporosis with pathological fracture | Weighted mode | -0.088284437 | 0.201946577 | 0.662388108 | -0.484099728 | 0.307530855 | 0.915500438 | 0.616251741 | 1.360062772 |
| SGLT2 Inhibitors | Osteoporosis with pathological fracture | MR Egger | -0.138428995 | 0.176861381 | 0.434589322 | -0.485077301 | 0.208219312 | 0.870725075 | 0.615649605 | 1.231483219 |
| SGLT2 Inhibitors | Osteoporosis with pathological fracture | Weighted median | -0.053603742 | 0.148551833 | 0.718217558 | -0.344765334 | 0.237557851 | 0.947807609 | 0.708386568 | 1.268148358 |
| SGLT2 Inhibitors | Osteoporosis with pathological fracture | Inverse variance weighted | -0.048770676 | 0.097534039 | 0.617048681 | -0.239937391 | 0.14239604 | 0.952399513 | 0.786677112 | 1.153033205 |
| SGLT2 Inhibitors | Osteoporosis with pathological fracture | Simple mode | -0.08633758 | 0.297382846 | 0.77182173 | -0.669207958 | 0.496532799 | 0.917284522 | 0.512114033 | 1.643014721 |
| SGLT2 Inhibitors | Osteoporosis with pathological fracture | Weighted mode | -0.045804628 | 0.175805966 | 0.794672874 | -0.390384321 | 0.298775065 | 0.955228569 | 0.676796718 | 1.348206331 |
| SGLT2 Inhibitors | Drug-induced osteoporosis | MR Egger | 0.184415298 | 0.396401245 | 0.642200175 | -0.592531143 | 0.961361739 | 1.202515122 | 0.552925977 | 2.615255344 |
| SGLT2 Inhibitors | Drug-induced osteoporosis | Weighted median | 0.141419687 | 0.365007945 | 0.698428451 | -0.573995886 | 0.856835259 | 1.151907987 | 0.563270173 | 2.355693724 |
| SGLT2 Inhibitors | Drug-induced osteoporosis | Inverse variance weighted | -0.00871182 | 0.218937145 | 0.968259417 | -0.437828625 | 0.420404985 | 0.991326018 | 0.645436385 | 1.522578052 |
| SGLT2 Inhibitors | Drug-induced osteoporosis | Simple mode | 0.514758556 | 0.809289522 | 0.525349575 | -1.071448907 | 2.100966018 | 1.67323446 | 0.34251189 | 8.174062392 |
| SGLT2 Inhibitors | Drug-induced osteoporosis | Weighted mode | 0.095521287 | 0.421950947 | 0.821100946 | -0.731502569 | 0.922545144 | 1.100232243 | 0.481185432 | 2.515685029 |
| SGLT2 Inhibitors | Drug-induced osteoporosis with pathological fracture | MR Egger | -0.019652743 | 0.357516454 | 0.956208729 | -0.720384992 | 0.681079506 | 0.980539113 | 0.486564896 | 1.976009695 |
| SGLT2 Inhibitors | Drug-induced osteoporosis with pathological fracture | Weighted median | -0.029934485 | 0.313387203 | 0.923902465 | -0.644173403 | 0.584304433 | 0.970509114 | 0.525096406 | 1.793742883 |
| SGLT2 Inhibitors | Drug-induced osteoporosis with pathological fracture | Inverse variance weighted | -0.058216545 | 0.197278973 | 0.767919347 | -0.444883332 | 0.328450241 | 0.943445627 | 0.640899044 | 1.388814133 |
| SGLT2 Inhibitors | Drug-induced osteoporosis with pathological fracture | Simple mode | -0.304039384 | 0.640990691 | 0.635703251 | -1.560381138 | 0.95230237 | 0.737831807 | 0.210055996 | 2.591669779 |

**Table S4 Mendelian randomization results of insulin and other subtypes, including osteoporosis.**

| exposure factors | outcome factors | method | b | se | pval | lo_ci | up_ci | or | or_lci95 | or_uci95 |
| --- | --- | --- | --- | --- | --- | --- | --- | --- | --- | --- |
| insulin | Osteoporosis | MR Egger | 9.175736495 | 11.84235066 | 0.481697252 | -14.03527081 | 32.3867438 | 9659.879907 | 8.02711E-07 | 1.16248E+14 |
| insulin | Osteoporosis | Weighted median | 6.402307509 | 3.946926218 | 0.10478202 | -1.333667877 | 14.1382829 | 603.2354043 | 0.263508968 | 1380950.924 |
| insulin | Osteoporosis | Inverse variance weighted | 5.557490424 | 4.6400527 | 0.231025495 | -3.537012868 | 14.65199372 | 259.1716087 | 0.029100123 | 2308234.989 |
| insulin | Osteoporosis | Simple mode | 2.915654468 | 6.749811447 | 0.683763265 | -10.31397597 | 16.1452849 | 18.4608905 | 3.31663E-05 | 10275622.53 |
| insulin | Osteoporosis | Weighted mode | 7.335285373 | 4.037290633 | 0.128925235 | -0.577804268 | 15.24837501 | 1533.465327 | 0.561129104 | 4190686.051 |
| insulin | Postmenopausal osteoporosis with pathological fracture | MR Egger | 19.99207938 | 19.538332 | 0.364045966 | -18.30305134 | 58.2872101 | 481337566 | 1.12483E-08 | 2.05975E+25 |
| insulin | Postmenopausal osteoporosis with pathological fracture | Weighted median | 13.02114876 | 8.881267725 | 0.142611166 | -4.386135981 | 30.4284335 | 451869.5274 | 0.012448739 | 1.64021E+13 |
| insulin | Postmenopausal osteoporosis with pathological fracture | Inverse variance weighted | 5.294617258 | 8.182776861 | 0.517603421 | -10.74362539 | 21.33285991 | 199.2613456 | 2.15826E-05 | 1839684461 |
| insulin | Postmenopausal osteoporosis with pathological fracture | Simple mode | 9.123281666 | 13.51845402 | 0.529696257 | -17.37288822 | 35.61945155 | 9166.232831 | 2.85135E-08 | 2.94667E+15 |
| insulin | Postmenopausal osteoporosis with pathological fracture | Weighted mode | 12.76279407 | 9.295955203 | 0.228145917 | -5.45727813 | 30.98286627 | 348988.4367 | 0.004265149 | 2.85554E+13 |
| insulin | Osteoporosis with pathological fracture | MR Egger | 25.66086906 | 19.01974426 | 0.248594598 | -11.6178297 | 62.93956782 | 1.39436E+11 | 9.00411E-06 | 2.15927E+27 |
| insulin | Osteoporosis with pathological fracture | Weighted median | 17.51100375 | 7.622563173 | 0.021603985 | 2.570779934 | 32.45122757 | 40265426.4 | 13.0760189 | 1.23991E+14 |
| insulin | Osteoporosis with pathological fracture | Inverse variance weighted | 11.42929436 | 7.957508629 | 0.150919685 | -4.16742255 | 27.02601128 | 91977.04948 | 0.015492139 | 5.46069E+11 |
| insulin | Osteoporosis with pathological fracture | Simple mode | 17.40734451 | 10.89035124 | 0.170842826 | -3.937743931 | 38.75243295 | 36300588.35 | 0.019492141 | 6.76033E+16 |
| insulin | Osteoporosis with pathological fracture | Weighted mode | 18.65565976 | 8.457199197 | 0.078509425 | 2.079549335 | 35.23177019 | 126488222.8 | 8.000862389 | 1.99969E+15 |
| insulin | Drug-induced osteoporosis | MR Egger | -15.27565539 | 51.8184099 | 0.782819558 | -116.8397388 | 86.28842801 | 2.32203E-07 | 1.80778E-51 | 2.98255E+37 |
| insulin | Drug-induced osteoporosis | Weighted median | -3.904167502 | 20.34210593 | 0.847800615 | -43.77469512 | 35.96636012 | 0.020157729 | 9.74746E-20 | 4.16861E+15 |
| insulin | Drug-induced osteoporosis | Inverse variance weighted | 20.39770263 | 21.45468376 | 0.341739298 | -21.65347753 | 62.44888279 | 722120535.6 | 3.9447E-10 | 1.32192E+27 |
| insulin | Drug-induced osteoporosis | Simple mode | 1.463119824 | 33.99392144 | 0.967335079 | -65.1649662 | 68.09120585 | 4.31941434 | 5.00282E-29 | 3.72937E+29 |
| insulin | Drug-induced osteoporosis | Weighted mode | -5.226021704 | 19.415343 | 0.798553389 | -43.28009399 | 32.82805058 | 0.005374866 | 1.59843E-19 | 1.80735E+14 |
| insulin | Drug-induced osteoporosis with pathological fracture | MR Egger | 10.43029444 | 31.49967546 | 0.75717121 | -51.30906945 | 72.16965834 | 33870.32166 | 5.209E-23 | 2.20234E+31 |
| insulin | Drug-induced osteoporosis with pathological fracture | Weighted median | 20.00274419 | 16.37103234 | 0.221769016 | -12.08447919 | 52.08996758 | 486498410.6 | 5.64647E-06 | 4.19165E+22 |
| insulin | Drug-induced osteoporosis with pathological fracture | Inverse variance weighted | 20.75983481 | 13.59895234 | 0.126866469 | -5.894111771 | 47.4137814 | 1037245849 | 0.002755623 | 3.9043E+20 |
| insulin | Drug-induced osteoporosis with pathological fracture | Simple mode | 24.76710937 | 23.96960103 | 0.348841494 | -22.21330865 | 71.7475274 | 57045177177 | 2.25363E-10 | 1.44396E+31 |

**Table S5 Mendelian randomization results of Gliclazide and subtypes, including osteoporosis.**

| exposure factors | outcome factors | method | b | se | pval | lo_ci | up_ci | or | or_lci95 | or_uci95 |
| --- | --- | --- | --- | --- | --- | --- | --- | --- | --- | --- |
| Gliclazide | Osteoporosis | MR Egger | 17.80853615 | 9.615791339 | 0.161102751 | -1.038414876 | 36.65548717 | 54218685.03 | 0.354015396 | 8.30378E+15 |
| Gliclazide | Osteoporosis | Weighted median | 9.944039082 | 5.024415224 | 0.047799844 | 0.096185242 | 19.79189292 | 20827.69941 | 1.10096299 | 394012393.3 |
| Gliclazide | Osteoporosis | Inverse variance weighted | 7.893719489 | 4.312242087 | 0.067169652 | -0.558275002 | 16.34571398 | 2680.395103 | 0.572195249 | 12556060.05 |
| Gliclazide | Osteoporosis | Simple mode | 6.377514634 | 8.901403053 | 0.513311119 | -11.06923535 | 23.82426462 | 588.4633421 | 1.55845E-05 | 22220133240 |
| Gliclazide | Osteoporosis | Weighted mode | 11.55402796 | 5.364897718 | 0.097582973 | 1.038828432 | 22.06922749 | 104195.8895 | 2.825904335 | 3841879311 |
| Gliclazide | Postmenopausal osteoporosis with pathological fracture | MR Egger | 29.26173197 | 22.14745428 | 0.278158642 | -14.14727842 | 72.67074237 | 5.1075E+12 | 7.17654E-07 | 3.63498E+31 |
| Gliclazide | Postmenopausal osteoporosis with pathological fracture | Weighted median | 19.08535276 | 11.30583504 | 0.091392499 | -3.074083929 | 41.24478944 | 194385285.9 | 0.046231961 | 8.17306E+17 |
| Gliclazide | Postmenopausal osteoporosis with pathological fracture | Inverse variance weighted | 18.44550183 | 9.925995766 | 0.063126082 | -1.009449868 | 37.90045353 | 102513169.7 | 0.364419403 | 2.88375E+16 |
| Gliclazide | Postmenopausal osteoporosis with pathological fracture | Simple mode | 1.337293594 | 18.39774638 | 0.945543998 | -34.72228932 | 37.39687651 | 3.808721596 | 8.32341E-16 | 1.74284E+16 |
| Gliclazide | Postmenopausal osteoporosis with pathological fracture | Weighted mode | 21.61854571 | 12.4477011 | 0.157434995 | -2.778948447 | 46.01603987 | 2448020827 | 0.062103778 | 9.64966E+19 |
| Gliclazide | Drug-induced osteoporosis | MR Egger | -96.44933046 | 71.59597454 | 0.270656022 | -236.7774406 | 43.87877964 | 1.29595E-42 | 1.4752E-103 | 1.13844E+19 |
| Gliclazide | Drug-induced osteoporosis | Weighted median | -33.94049787 | 24.92436755 | 0.173280085 | -82.79225826 | 14.91126253 | 1.81898E-15 | 1.10606E-36 | 2991431.303 |
| Gliclazide | Drug-induced osteoporosis | Inverse variance weighted | -27.93163003 | 32.69496226 | 0.392933302 | -92.01375607 | 36.150496 | 7.40367E-13 | 1.09379E-40 | 5.01142E+15 |
| Gliclazide | Drug-induced osteoporosis | Simple mode | -70.44654251 | 52.86496214 | 0.253515022 | -174.0618683 | 33.16878328 | 2.54364E-31 | 2.54619E-76 | 2.54109E+14 |
| Gliclazide | Drug-induced osteoporosis | Weighted mode | -41.7803732 | 28.35097938 | 0.21457055 | -97.34829278 | 13.78754637 | 7.16167E-19 | 5.27441E-43 | 972423.1951 |
| Gliclazide | Drug-induced osteoporosis with pathological fracture | MR Egger | -32.23325322 | 42.26304477 | 0.501138972 | -115.068821 | 50.60231453 | 1.00294E-14 | 1.0623E-50 | 9.46904E+21 |
| Gliclazide | Drug-induced osteoporosis with pathological fracture | Weighted median | 12.66604608 | 21.46085334 | 0.555061244 | -29.39722646 | 54.72931862 | 316806.3802 | 1.70981E-13 | 5.87004E+23 |
| Gliclazide | Drug-induced osteoporosis with pathological fracture | Inverse variance weighted | 8.324240182 | 18.97437951 | 0.660872057 | -28.86554367 | 45.51402403 | 4122.603591 | 2.90974E-13 | 5.84103E+19 |
| Gliclazide | Drug-induced osteoporosis with pathological fracture | Simple mode | 37.64635213 | 32.43896455 | 0.310377333 | -25.93401839 | 101.2267227 | 2.23668E+16 | 5.45757E-12 | 9.16657E+43 |
